# Supplementary material for: A Mendelian randomization study of the effects of blood lipids on breast cancer risk
Source: PubMed Central journal article supplement (PMC6160471; doi:10.1038/s41467-018-06467-9), 2018-09-27
Supplement: 41467_2018_6467_MOESM1_ESM.pdf [file 41467_2018_6467_MOESM1_ESM.pdf]

Supplementary Information

**A Mendelian randomization study of the effects of blood lipids on breast cancer risk**

Nowak et al.

### **Supplementary Table 1**

Genetic variants used in instrumental variable analysis for blood lipids.





## **Supplementary Table 2**

Genetic variants used in instrumental variable analysis for genes encoding drug targets.

Genetic variants used in instrumental variable analysis for genes encoding drug targets

| Gene   | rsid        | SNP_hg19       | lipid_eff<br>ct_allele | lipid_oth<br>r_allele | ldl_b    | ldl_se   | ldl_p     | breast_ca<br>ncr_oth<br>er_allele | breast_ca<br>ncr_eff<br>ct_allele | bca_b     | bca_se   | bca_p    | erpos_b   | erpos_se | erpos_b  | erneg_b   | erneg_se | erneg_p  |
|--------|-------------|----------------|------------------------|-----------------------|----------|----------|-----------|-----------------------------------|-----------------------------------|-----------|----------|----------|-----------|----------|----------|-----------|----------|----------|
| PCSK9  | rs11206514  | chr1:55156004  | a                      | c                     | 5.07E-02 | 4.10E-03 | 9.95E-33  | C                                 | A                                 | 7.00E-03  | 7.00E-03 | 3.16E-01 | -3.90E-03 | 8.30E-03 | 6.40E-01 | 2.73E-02  | 1.25E-02 | 2.91E-02 |
| PCSK9  | rs11591147  | chr1:55505647  | g                      | t                     | 4.97E-01 | 1.80E-02 | 8.58E-143 | G                                 | T                                 | -4.42E-02 | 2.73E-02 | 1.06E-01 | -2.40E-02 | 3.21E-02 | 4.55E-01 | -6.22E-02 | 5.17E-02 | 2.28E-01 |
| PCSK9  | rs12067569  | chr1:55528629  | a                      | g                     | 8.85E-02 | 1.00E-02 | 1.97E-17  | G                                 | A                                 | 2.00E-04  | 1.75E-02 | 9.90E-01 | -9.70E-03 | 2.09E-02 | 6.44E-01 | 2.50E-03  | 3.18E-02 | 9.37E-01 |
| PCSK9  | rs2483205   | chr1:55518316  | c                      | t                     | 5.14E-02 | 5.30E-03 | 4.74E-20  | C                                 | T                                 | -7.80E-03 | 6.90E-03 | 2.61E-01 | -8.20E-03 | 8.20E-03 | 3.14E-01 | -9.40E-03 | 1.25E-02 | 4.53E-01 |
| PCSK9  | rs4927193   | chr1:55509872  | t                      | c                     | 3.52E-02 | 5.60E-03 | 4.27E-11  | T                                 | C                                 | -2.40E-03 | 9.90E-03 | 8.10E-01 | 4.20E-03  | 1.18E-02 | 7.21E-01 | -1.60E-02 | 1.80E-02 | 3.74E-01 |
| PCSK9  | rs572512    | chr1:55517344  | t                      | c                     | 4.78E-02 | 4.70E-03 | 5.31E-26  | C                                 | T                                 | 7.20E-03  | 7.40E-03 | 3.28E-01 | 8.20E-03  | 8.80E-03 | 3.50E-01 | 4.80E-03  | 1.34E-02 | 7.20E-01 |
| PCSK9  | rs7552841   | chr1:55518752  | t                      | c                     | 3.68E-02 | 4.40E-03 | 5.40E-15  | C                                 | T                                 | -7.10E-03 | 7.70E-03 | 3.58E-01 | -6.00E-04 | 9.20E-03 | 9.51E-01 | -1.11E-02 | 1.41E-02 | 4.33E-01 |
| CETP   | rs11076174  | chr16:57003146 | t                      | c                     | 1.80E-01 | 7.50E-03 | 2.28E-127 | T                                 | C                                 | -2.18E-02 | 1.20E-02 | 6.79E-02 | -1.86E-02 | 1.42E-02 | 1.90E-01 | -3.56E-02 | 2.18E-02 | 1.03E-01 |
| CETP   | rs117040820 | chr16:57005762 | t                      | c                     | 1.81E-01 | 2.16E-02 | 2.23E-14  | C                                 | T                                 | 4.29E-02  | 3.43E-02 | 2.12E-01 | 5.05E-02  | 4.11E-02 | 2.20E-01 | -3.30E-03 | 6.41E-02 | 9.59E-01 |
| CETP   | rs118146573 | chr16:57000938 | g                      | a                     | 2.62E-01 | 7.40E-03 | 2.03E-236 | G                                 | A                                 | -4.30E-03 | 1.01E-02 | 6.68E-01 | -1.40E-03 | 1.20E-02 | 9.06E-01 | -2.63E-02 | 1.85E-02 | 1.54E-01 |
| CETP   | rs12597002  | chr16:57002404 | c                      | a                     | 8.49E-02 | 3.90E-03 | 1.13E-102 | C                                 | A                                 | -1.33E-02 | 6.80E-03 | 4.98E-02 | -2.07E-02 | 8.00E-03 | 1.03E-02 | 5.00E-03  | 1.23E-02 | 6.85E-01 |
| CETP   | rs12720873  | chr16:57006072 | a                      | g                     | 9.54E-02 | 1.39E-02 | 1.88E-10  | G                                 | A                                 | 1.51E-02  | 1.91E-02 | 4.29E-01 | 1.28E-02  | 2.27E-02 | 5.73E-01 | 2.54E-02  | 3.54E-02 | 4.73E-01 |
| CETP   | rs1864163   | chr16:56997233 | g                      | a                     | 2.25E-01 | 4.20E-03 | 0.00E+00  | G                                 | A                                 | -6.90E-03 | 7.20E-03 | 3.35E-01 | -7.70E-03 | 8.60E-03 | 3.71E-01 | -1.41E-02 | 1.31E-02 | 2.80E-01 |
| CETP   | rs289714    | chr16:57007451 | a                      | g                     | 2.14E-01 | 5.00E-03 | 0.00E+00  | G                                 | A                                 | 5.80E-03  | 8.60E-03 | 4.99E-01 | 2.20E-03  | 1.02E-02 | 8.33E-01 | 1.30E-02  | 1.56E-02 | 4.05E-01 |
| CETP   | rs4784745   | chr16:57014875 | a                      | g                     | 8.04E-02 | 5.50E-03 | 3.50E-46  | A                                 | G                                 | -1.47E-02 | 6.50E-03 | 2.46E-02 | -1.46E-02 | 7.80E-03 | 6.11E-02 | -1.25E-02 | 1.19E-02 | 2.94E-01 |
| CETP   | rs5880      | chr16:57015091 | g                      | c                     | 3.07E-01 | 9.00E-03 | 1.37E-233 | G                                 | C                                 | -7.80E-03 | 1.54E-02 | 6.10E-01 | -1.40E-02 | 1.84E-02 | 4.46E-01 | 6.00E-04  | 2.83E-02 | 9.83E-01 |
| CETP   | rs5883      | chr16:57007353 | t                      | c                     | 1.15E-01 | 8.40E-03 | 1.76E-31  | C                                 | T                                 | 1.44E-02  | 1.43E-02 | 3.13E-01 | 2.35E-02  | 1.70E-02 | 1.65E-01 | -1.41E-02 | 2.63E-02 | 5.93E-01 |
| CETP   | rs9923854   | chr16:57017002 | g                      | t                     | 8.44E-02 | 9.70E-03 | 1.53E-15  | T                                 | G                                 | 9.00E-04  | 1.06E-02 | 9.34E-01 | 7.20E-03  | 1.26E-02 | 5.71E-01 | -3.00E-04 | 1.93E-02 | 9.88E-01 |
| NPC1L1 | rs17655652  | chr7:44580991  | t                      | c                     | 2.80E-02 | 4.40E-03 | 2.18E-10  | T                                 | C                                 | -1.43E-02 | 7.70E-03 | 6.29E-02 | -1.91E-02 | 9.30E-03 | 3.93E-02 | -7.90E-03 | 1.40E-02 | 5.70E-01 |
| NPC1L1 | rs2072183   | chr7:44579180  | c                      | g                     | 3.86E-02 | 4.70E-03 | 7.12E-16  | G                                 | C                                 | 7.60E-03  | 8.00E-03 | 3.44E-01 | 1.06E-02  | 9.50E-03 | 2.67E-01 | -2.30E-03 | 1.45E-02 | 8.74E-01 |
| NPC1L1 | rs217406    | chr7:44573761  | g                      | c                     | 3.88E-02 | 5.20E-03 | 4.09E-14  | C                                 | G                                 | 1.30E-02  | 9.00E-03 | 1.49E-01 | 1.75E-02  | 1.08E-02 | 1.04E-01 | -5.50E-03 | 1.65E-02 | 7.40E-01 |
| LDLR   | rs2738464   | chr19:11242307 | c                      | g                     | 4.22E-02 | 6.10E-03 | 2.73E-10  | G                                 | C                                 | -8.80E-03 | 9.90E-03 | 3.74E-01 | -1.14E-02 | 1.18E-02 | 3.37E-01 | 3.10E-03  | 1.81E-02 | 8.65E-01 |
| LDLR   | rs5742911   | chr19:11243445 | a                      | g                     | 6.06E-02 | 5.70E-03 | 4.83E-24  | A                                 | G                                 | -8.00E-03 | 6.90E-03 | 2.46E-01 | -1.04E-02 | 8.20E-03 | 2.03E-01 | 4.00E-03  | 1.25E-02 | 7.50E-01 |
| LDLR   | rs6511720   | chr19:11202306 | g                      | t                     | 2.21E-01 | 6.10E-03 | 3.85E-262 | G                                 | T                                 | 1.40E-03  | 1.03E-02 | 8.95E-01 | 4.00E-04  | 1.23E-02 | 9.72E-01 | 2.02E-02  | 1.85E-02 | 2.77E-01 |
| LDLR   | rs6511721   | chr19:11206575 | g                      | a                     | 6.06E-02 | 5.10E-03 | 1.35E-29  | G                                 | A                                 | -5.70E-03 | 6.90E-03 | 4.08E-01 | -7.90E-03 | 8.20E-03 | 3.31E-01 | 3.20E-03  | 1.24E-02 | 8.00E-01 |
| LDLR   | rs688       | chr19:11227602 | t                      | c                     | 5.40E-02 | 3.70E-03 | 1.01E-43  | C                                 | T                                 | 6.50E-03  | 6.20E-03 | 2.97E-01 | 1.06E-02  | 7.40E-03 | 1.55E-01 | 1.02E-02  | 1.13E-02 | 3.67E-01 |
| LDLR   | rs73015030  | chr19:11207516 | g                      | a                     | 1.52E-01 | 1.48E-02 | 2.62E-22  | G                                 | A                                 | 2.29E-02  | 2.04E-02 | 2.62E-01 | 3.05E-02  | 2.45E-02 | 2.13E-01 | 9.60E-03  | 3.73E-02 | 7.96E-01 |
| HMGCR  | rs10515198  | chr5:74641560  | a                      | g                     | 5.99E-02 | 6.10E-03 | 5.99E-22  | G                                 | A                                 | 2.50E-03  | 1.03E-02 | 8.10E-01 | -7.40E-03 | 1.23E-02 | 5.48E-01 | -5.00E-03 | 1.88E-02 | 7.92E-01 |
| HMGCR  | rs12916     | chr5:74656539  | c                      | t                     | 7.33E-02 | 3.80E-03 | 7.79E-78  | T                                 | C                                 | 1.13E-02  | 6.30E-03 | 7.17E-02 | 1.36E-02  | 7.50E-03 | 6.89E-02 | 1.05E-02  | 1.15E-02 | 3.60E-01 |
| HMGCR  | rs2303152   | chr5:74641707  | a                      | g                     | 4.23E-02 | 6.40E-03 | 1.04E-09  | G                                 | A                                 | 7.70E-03  | 1.02E-02 | 4.48E-01 | 2.22E-02  | 1.21E-02 | 6.72E-02 | 5.00E-04  | 1.86E-02 | 9.79E-01 |

### **Supplementary Table 3**

Mendelian randomization results using genetic variants associated with blood lipid levels ( $P < 5 \times 10^{-8}$ ) as instrumental variables.

Mendelian randomization results using all independent genetic variants associated with blood lipid levels ( $P < 5 \times 10^{-8}$ ) as instrumental variables for low-density lipoprotein-cholesterol (LDL), high-density lipoprotein-cholesterol (HDL) and triglycerides (TG). Outcomes are risk of any breast cancer (BCA), risk of estrogen receptor positive (ERpos) and negative (ERneg) breast cancer.

|       | LDL       | b      | se    | 95% lci | 95% uci | p     | OR    | 95% LCI | 95% UCI | Q' p-value |
|-------|-----------|--------|-------|---------|---------|-------|-------|---------|---------|------------|
| BCA   | IVW       | 0.048  | 0.025 | -0.001  | 0.098   | 0.055 | 1.050 | 0.999   | 1.103   | 3.33E-16   |
|       | Egger     | 0.004  | 0.039 | -0.073  | 0.081   | 0.917 | 1.004 | 0.930   | 1.084   |            |
|       | Intercept | 0.003  | 0.002 | -0.001  | 0.008   | 0.140 | 1.003 | 0.999   | 1.008   |            |
|       | Median    | 0.045  | 0.025 | -0.003  | 0.094   | 0.064 | 1.046 | 0.997   | 1.098   |            |
| Erpos | IVW       | 0.041  | 0.028 | -0.014  | 0.095   | 0.144 | 1.041 | 0.986   | 1.100   | 1.59E-11   |
|       | Egger     | -0.022 | 0.043 | -0.106  | 0.062   | 0.604 | 0.978 | 0.899   | 1.064   |            |
|       | Intercept | 0.005  | 0.002 | 0.000   | 0.010   | 0.056 | 1.005 | 1.000   | 1.010   |            |
|       | Median    | 0.010  | 0.029 | -0.047  | 0.066   | 0.742 | 1.010 | 0.954   | 1.068   |            |
| Erneg | IVW       | 0.037  | 0.037 | -0.036  | 0.109   | 0.321 | 1.037 | 0.965   | 1.115   | 5.19E-06   |
|       | Egger     | 0.028  | 0.058 | -0.086  | 0.143   | 0.629 | 1.029 | 0.917   | 1.153   |            |
|       | Intercept | 0.001  | 0.003 | -0.006  | 0.007   | 0.851 | 1.001 | 0.994   | 1.007   |            |
|       | Median    | 0.051  | 0.047 | -0.040  | 0.143   | 0.271 | 1.053 | 0.961   | 1.154   |            |
| <hr/> |           |        |       |         |         |       |       |         |         |            |
|       | HDL       | b      | se    | 95% lci | 95% uci | p     | OR    | 95% LCI | 95% UCI | Q' p-value |
| BCA   | IVW       | 0.096  | 0.032 | 0.034   | 0.158   | 0.003 | 1.101 | 1.034   | 1.171   | 7.06E-26   |
|       | Egger     | 0.056  | 0.053 | -0.049  | 0.160   | 0.295 | 1.057 | 0.953   | 1.174   |            |
|       | Intercept | 0.002  | 0.003 | -0.003  | 0.007   | 0.350 | 1.002 | 0.997   | 1.007   |            |
|       | Median    | 0.054  | 0.027 | 0.001   | 0.108   | 0.047 | 1.056 | 1.001   | 1.114   |            |
| Erpos | IVW       | 0.103  | 0.034 | 0.037   | 0.169   | 0.002 | 1.109 | 1.038   | 1.185   | 9.68E-17   |
|       | Egger     | 0.048  | 0.057 | -0.063  | 0.159   | 0.401 | 1.049 | 0.939   | 1.172   |            |
|       | Intercept | 0.003  | 0.003 | -0.002  | 0.008   | 0.221 | 1.003 | 0.998   | 1.008   |            |
|       | Median    | 0.048  | 0.032 | -0.013  | 0.110   | 0.125 | 1.050 | 0.987   | 1.116   |            |
| Erneg | IVW       | 0.086  | 0.046 | -0.004  | 0.177   | 0.062 | 1.090 | 0.996   | 1.194   | 2.40E-10   |
|       | Egger     | 0.108  | 0.078 | -0.045  | 0.262   | 0.166 | 1.114 | 0.956   | 1.299   |            |
|       | Intercept | -0.001 | 0.004 | -0.008  | 0.006   | 0.725 | 0.999 | 0.992   | 1.006   |            |
|       | Median    | 0.051  | 0.049 | -0.046  | 0.148   | 0.303 | 1.052 | 0.955   | 1.159   |            |
| <hr/> |           |        |       |         |         |       |       |         |         |            |
|       | TG        | b      | se    | 95% lci | 95% uci | p     | OR    | 95% LCI | 95% UCI | Q' p-value |
| BCA   | IVW       | -0.096 | 0.043 | -0.181  | -0.011  | 0.026 | 0.908 | 0.834   | 0.989   | 6.19E-26   |
|       | Egger     | -0.124 | 0.073 | -0.266  | 0.019   | 0.089 | 0.884 | 0.766   | 1.019   |            |
|       | Intercept | 0.002  | 0.004 | -0.006  | 0.009   | 0.636 | 1.002 | 0.994   | 1.009   |            |
|       | Median    | -0.093 | 0.031 | -0.154  | -0.033  | 0.002 | 0.911 | 0.857   | 0.967   |            |
| Erpos | IVW       | -0.099 | 0.047 | -0.191  | -0.007  | 0.036 | 0.906 | 0.826   | 0.993   | 3.99E-19   |
|       | Egger     | -0.139 | 0.079 | -0.293  | 0.016   | 0.078 | 0.871 | 0.746   | 1.016   |            |
|       | Intercept | 0.003  | 0.004 | -0.005  | 0.011   | 0.529 | 1.003 | 0.995   | 1.011   |            |
|       | Median    | -0.087 | 0.036 | -0.158  | -0.017  | 0.015 | 0.916 | 0.854   | 0.983   |            |
| Erneg | IVW       | -0.106 | 0.055 | -0.213  | 0.001   | 0.052 | 0.899 | 0.808   | 1.001   | 6.99E-07   |
|       | Egger     | -0.094 | 0.092 | -0.274  | 0.086   | 0.308 | 0.911 | 0.761   | 1.090   |            |
|       | Intercept | -0.001 | 0.005 | -0.010  | 0.009   | 0.865 | 0.999 | 0.990   | 1.009   |            |
|       | Median    | -0.089 | 0.057 | -0.201  | 0.023   | 0.121 | 0.915 | 0.818   | 1.024   |            |

**IVW** Inverse variance-weighted method

**Egger** MR Egger method

**Intercept** Intercept term from MR Egger regression

**Median** Weighted Median method. Bowden et al. Genet Epidemiol 2016;40(4):304-314. PMID 27061298.

**Q' p-value** Q' heterogeneity test using modified second order weighting for two-sample Mendelian randomization studies. Bowden et al. Improving the accuracy of two-sample summary data Mendelian randomization: moving beyond the NOME assumption. Preprint manuscript posted on bioRxiv February 27, 2018. doi: <https://doi.org/10.1101/159442>



#### **Supplementary Table 4**

Mendelian randomization results using genetic variants associated with blood lipid levels ( $P < 5 \times 10^{-8}$ ) as instrumental variables. For each lipid, all variants associated with any of the other two lipids ( $P < 0.001$ ) have been excluded.

Mendelian randomization results using independent genetic variants associated with blood lipid levels ( $P < 5 \times 10^{-8}$ ) as instrumental variables for low-density lipoprotein-cholesterol (LDL), high-density lipoprotein-cholesterol (HDL) and triglycerides (TG). Outcomes are risk of any breast cancer (BCA), risk of estrogen receptor positive (ERpos) and negative (ERneg) breast cancer. For each lipid, all variants that are also associated with any of the other two lipids ( $P < 0.001$ ) have been excluded.

|       | LDL       | b      | se    | 95% lci | 95% uci | p     | OR    | 95% LCI | 95% UCI | Q' p-value |
|-------|-----------|--------|-------|---------|---------|-------|-------|---------|---------|------------|
| BCA   | IVW       | 0.114  | 0.048 | 0.020   | 0.208   | 0.017 | 1.121 | 1.021   | 1.231   | 3.97E-08   |
|       | Egger     | 0.169  | 0.129 | -0.084  | 0.422   | 0.191 | 1.184 | 0.919   | 1.525   |            |
|       | Intercept | -0.002 | 0.005 | -0.012  | 0.007   | 0.647 | 0.998 | 0.988   | 1.007   |            |
|       | Median    | 0.148  | 0.048 | 0.054   | 0.243   | 0.002 | 1.160 | 1.055   | 1.275   |            |
| ERpos | IVW       | 0.153  | 0.053 | 0.050   | 0.257   | 0.004 | 1.166 | 1.051   | 1.293   | 1.08E-05   |
|       | Egger     | 0.165  | 0.152 | -0.133  | 0.463   | 0.278 | 1.179 | 0.876   | 1.588   |            |
|       | Intercept | 0.000  | 0.006 | -0.012  | 0.011   | 0.934 | 1.000 | 0.988   | 1.011   |            |
|       | Median    | 0.193  | 0.059 | 0.077   | 0.309   | 0.001 | 1.213 | 1.080   | 1.362   |            |
| ERneg | IVW       | 0.028  | 0.064 | -0.097  | 0.152   | 0.663 | 1.028 | 0.908   | 1.165   | 0.041      |
|       | Egger     | 0.130  | 0.173 | -0.209  | 0.469   | 0.451 | 1.139 | 0.812   | 1.598   |            |
|       | Intercept | -0.004 | 0.007 | -0.017  | 0.009   | 0.523 | 0.996 | 0.983   | 1.009   |            |
|       | Median    | 0.034  | 0.083 | -0.129  | 0.196   | 0.685 | 1.034 | 0.879   | 1.216   |            |
| <hr/> |           |        |       |         |         |       |       |         |         |            |
|       | HDL       | b      | se    | 95% lci | 95% uci | p     | OR    | 95% LCI | 95% UCI | Q' p-value |
| BCA   | IVW       | 0.075  | 0.058 | -0.039  | 0.189   | 0.198 | 1.078 | 0.962   | 1.208   | 0.003      |
|       | Egger     | 0.117  | 0.168 | -0.212  | 0.447   | 0.485 | 1.125 | 0.809   | 1.563   |            |
|       | Intercept | -0.001 | 0.005 | -0.012  | 0.009   | 0.787 | 0.999 | 0.988   | 1.009   |            |
|       | Median    | 0.085  | 0.066 | -0.045  | 0.214   | 0.200 | 1.088 | 0.956   | 1.239   |            |
| ERpos | IVW       | 0.123  | 0.056 | 0.013   | 0.233   | 0.028 | 1.131 | 1.014   | 1.263   | 0.169      |
|       | Egger     | 0.053  | 0.161 | -0.263  | 0.369   | 0.742 | 1.054 | 0.769   | 1.446   |            |
|       | Intercept | 0.002  | 0.005 | -0.008  | 0.012   | 0.641 | 1.002 | 0.992   | 1.012   |            |
|       | Median    | 0.119  | 0.073 | -0.024  | 0.262   | 0.102 | 1.127 | 0.977   | 1.300   |            |
| ERneg | IVW       | 0.015  | 0.106 | -0.192  | 0.221   | 0.890 | 1.015 | 0.825   | 1.248   | 0.003      |
|       | Egger     | 0.466  | 0.289 | -0.101  | 1.032   | 0.108 | 1.593 | 0.904   | 2.808   |            |
|       | Intercept | -0.015 | 0.009 | -0.033  | 0.003   | 0.096 | 0.985 | 0.967   | 1.003   |            |
|       | Median    | 0.046  | 0.118 | -0.185  | 0.277   | 0.697 | 1.047 | 0.831   | 1.319   |            |
| <hr/> |           |        |       |         |         |       |       |         |         |            |
|       | TG        | b      | se    | 95% lci | 95% uci | p     | OR    | 95% LCI | 95% UCI | Q' p-value |
| BCA   | IVW       | -0.110 | 0.133 | -0.371  | 0.151   | 0.407 | 0.896 | 0.690   | 1.163   | 0.153      |
|       | Egger     | -0.463 | 0.401 | -1.248  | 0.323   | 0.248 | 0.630 | 0.287   | 1.381   |            |
|       | Intercept | 0.013  | 0.014 | -0.015  | 0.041   | 0.350 | 1.013 | 0.985   | 1.042   |            |
|       | Median    | -0.120 | 0.117 | -0.349  | 0.108   | 0.302 | 0.887 | 0.705   | 1.114   |            |
| ERpos | IVW       | -0.111 | 0.202 | -0.507  | 0.285   | 0.583 | 0.895 | 0.602   | 1.330   | 0.036      |
|       | Egger     | -0.361 | 0.707 | -1.747  | 1.025   | 0.610 | 0.697 | 0.174   | 2.788   |            |
|       | Intercept | 0.009  | 0.025 | -0.040  | 0.059   | 0.707 | 1.010 | 0.961   | 1.061   |            |
|       | Median    | -0.058 | 0.140 | -0.332  | 0.216   | 0.679 | 0.944 | 0.717   | 1.242   |            |
| ERneg | IVW       | -0.151 | 0.290 | -0.719  | 0.418   | 0.603 | 0.860 | 0.487   | 1.519   | 0.056      |
|       | Egger     | -1.478 | 0.537 | -2.529  | -0.426  | 0.006 | 0.228 | 0.080   | 0.653   |            |
|       | Intercept | 0.050  | 0.019 | 0.013   | 0.088   | 0.009 | 1.052 | 1.013   | 1.092   |            |
|       | Median    | -0.200 | 0.207 | -0.607  | 0.206   | 0.335 | 0.819 | 0.545   | 1.229   |            |

IVW Inverse variance-weighted method

Egger MR Egger method

Intercept Intercept term from MR Egger regression

Median Weighted Median method. Bowden et al. Genet Epidemiol 2016;40(4):304-314. PMID 27061298.

Q' heterogeneity test using modified second order weighting for two-sample Mendelian randomization studies. Bowden et al. Improving the accuracy of two-sample summary data Mendelian randomization: moving beyond the NOME assumption. Preprint manuscript posted on bioRxiv February 27, 2018. doi: <https://doi.org/10.1101/159442>

### **Supplementary Table 5**

Results from MR-PRESSO applied after excluding genetic variants associated with other lipids ( $P < 0.001$ ).

MR-PRESSO (Mendelian randomization pleiotropy residual sum and outlier) results using independent genetic variants associated with blood lipid levels (P<5e-08) as instrumental variables for low-density lipoprotein-cholesterol (LDL), high-density lipoprotein-cholesterol (HDL) and triglycerides (TG). Outcomes are risk of any breast cancer (BCA), risk of estrogen receptor positive (ERpos) and negative (ERneg) breast cancer. For each lipid, all variants that are also associated with any of the other two lipids (P<0.001) have been excluded.

|            |                             | Causal estimate | SE    | P-value | OR    | 95% LCI | 95% UCI | MR-PRESSO global heterogeneity p-value | Q' p-value |
|------------|-----------------------------|-----------------|-------|---------|-------|---------|---------|----------------------------------------|------------|
| <b>LDL</b> |                             |                 |       |         |       |         |         |                                        |            |
| BCA        | IVW (initial)               | 0.114           | 0.048 | 0.021   | 1.121 | 1.021   | 1.231   | <0.001                                 | 3.97E-08   |
|            | IVW (after outlier removal) | 0.090           | 0.037 | 0.020   | 1.094 | 1.018   | 1.176   | 0.109                                  | 0.102      |
| ERPos      | IVW (initial)               | 0.153           | 0.053 | 0.006   | 1.166 | 1.051   | 1.293   | <0.001                                 | 1.08E-05   |
|            | IVW (after outlier removal) | 0.129           | 0.043 | 0.004   | 1.138 | 1.047   | 1.237   | 0.125                                  | 0.124      |
| Erneg      | IVW (initial)               | 0.028           | 0.064 | 0.666   | 1.028 | 0.908   | 1.165   | 0.048                                  | 0.041      |
|            | IVW (after outlier removal) | 0.031           | 0.055 | 0.577   | 1.032 | 0.926   | 1.150   | 0.438                                  | 0.438      |
| <b>HDL</b> |                             |                 |       |         |       |         |         |                                        |            |
| BCA        | IVW (initial)               | 0.075           | 0.058 | 0.209   | 1.078 | 0.962   | 1.208   | 0.002                                  | 0.003      |
|            | IVW (after outlier removal) | 0.072           | 0.051 | 0.171   | 1.074 | 0.973   | 1.187   | 0.092                                  | 0.090      |
| Erpos      | IVW (initial)               | 0.123           | 0.056 | 0.037   | 1.131 | 1.014   | 1.263   | 0.202                                  | 0.169      |
|            |                             | -               | -     | -       | -     | -       | -       | -                                      | -          |
| Erneg      | IVW (initial)               | 0.015           | 0.106 | 0.891   | 1.015 | 0.825   | 1.248   | 0.003                                  | 0.003      |
|            | IVW (after outlier removal) | 0.084           | 0.091 | 0.365   | 1.088 | 0.910   | 1.301   | 0.115                                  | 0.108      |
| <b>TG*</b> |                             |                 |       |         |       |         |         |                                        |            |
| BCA        | IVW (initial)               | -0.110          | 0.133 | 0.468   | 0.896 | 0.690   | 1.163   | 0.316                                  | 0.153      |
|            |                             | -               | -     | -       | -     | -       | -       | -                                      | -          |
| Erpos      | IVW (initial)               | -0.111          | 0.202 | 0.621   | 0.895 | 0.602   | 1.330   | 0.149                                  | 0.036      |
|            |                             | -               | -     | -       | -     | -       | -       | -                                      | -          |
| Erneg      | IVW (initial)               | -0.151          | 0.290 | 0.639   | 0.860 | 0.487   | 1.519   | 0.037                                  | 0.056      |
|            |                             | -               | -     | -       | -     | -       | -       | -                                      | -          |

\*(too few variants to exclude outliers)

IVW (initial)

Inverse variance-weighted analysis

IVW (after outlier removal)

Inverse variance-weighted analysis after removal of outlying variants identified by the MR-PRESSO heterogeneity test

Q' p-value

Q' heterogeneity test using modified second order weighting for two-sample Mendelian randomization studies. Bowden et al. Improving the accuracy of two-sample summary data Mendelian randomization: moving beyond the NOME assumption. Preprint manuscript posted on biorxiv February 27, 2018. doi: <https://doi.org/10.1101/159442>

MR-PRESSO global heterogeneity p-value

MR-PRESSO global heterogeneity test. Verbanck et al. Nat Genet 2018;50(5):693-698. PMID: 29686387.

### **Supplementary Table 6**

Results from MR-PRESSO applied without excluding genetic variants associated with other lipids.

MR-PRESSO (Mendelian randomization pleiotropy residual sum and outlier) results using independent genetic variants associated with blood lipid levels (P<5e-08) as instrumental variables for low-density lipoprotein-cholesterol (LDL), high-density lipoprotein-cholesterol (HDL) and triglycerides (TG). Outcomes are risk of any breast cancer (BCA), risk of estrogen receptor positive (ERpos) and negative (ERneg) breast cancer.

|            |                             | Causal estimate | SE    | P-value  | OR    | 95% LCI | 95% UCI | MR-PRESSO global heterogeneity p-value | Q' p-value |
|------------|-----------------------------|-----------------|-------|----------|-------|---------|---------|----------------------------------------|------------|
| <b>LDL</b> |                             |                 |       |          |       |         |         |                                        |            |
| BCA        | IVW (initial)               | 0.048           | 0.025 | 0.058    | 1.050 | 0.999   | 1.103   | <2e-04                                 | 3.32E-16   |
|            | IVW (after outlier removal) | 0.028           | 0.022 | 0.198    | 1.028 | 0.986   | 1.073   | <2e-04                                 | 2.79E-07   |
| ERPos      | IVW (initial)               | 0.041           | 0.028 | 0.148    | 1.041 | 0.986   | 1.100   | <2e-04                                 | 1.59E-11   |
|            | IVW (after outlier removal) | 0.022           | 0.025 | 0.364    | 1.023 | 0.975   | 1.073   | <2e-04                                 | 7.34E-06   |
| Erneg      | IVW (initial)               | 0.037           | 0.037 | 0.325    | 1.037 | 0.965   | 1.115   | <2e-04                                 | 5.19E-06   |
|            | IVW (after outlier removal) | 0.031           | 0.036 | 0.389    | 1.032 | 0.961   | 1.107   | <2e-04                                 | 4.58E-05   |
| <b>HDL</b> |                             |                 |       |          |       |         |         |                                        |            |
| BCA        | IVW (initial)               | 0.096           | 0.032 | 0.003    | 1.101 | 1.034   | 1.171   | <2e-04                                 | 7.00E-26   |
|            | IVW (after outlier removal) | 0.086           | 0.025 | 0.001    | 1.090 | 1.037   | 1.145   | <2e-04                                 | 1.44E-09   |
| Erpos      | IVW (initial)               | 0.103           | 0.034 | 0.003    | 1.109 | 1.038   | 1.185   | <2e-04                                 | 9.64E-17   |
|            | IVW (after outlier removal) | 0.099           | 0.027 | 0.001    | 1.104 | 1.046   | 1.164   | <2e-04                                 | 1.05E-05   |
| Erneg      | IVW (initial)               | 0.086           | 0.046 | 0.066    | 1.090 | 0.996   | 1.194   | <2e-04                                 | 2.40E-10   |
|            | IVW (after outlier removal) | 0.076           | 0.041 | 0.071    | 1.079 | 0.995   | 1.170   | <2e-04                                 | 8.65E-06   |
| <b>TG</b>  |                             |                 |       |          |       |         |         |                                        |            |
| BCA        | IVW (initial)               | -0.096          | 0.043 | 0.031    | 0.908 | 0.834   | 0.989   | <2e-04                                 | 6.14E-26   |
|            | IVW (after outlier removal) | -0.109          | 0.027 | 1.72E-04 | 0.897 | 0.851   | 0.945   | 0.001                                  | 1.31E-03   |
| Erpos      | IVW (initial)               | -0.099          | 0.047 | 0.041    | 0.906 | 0.826   | 0.993   | <2e-04                                 | 3.98E-19   |
|            | IVW (after outlier removal) | -0.122          | 0.028 | 8.96E-05 | 0.885 | 0.837   | 0.936   | 0.051                                  | 4.52E-02   |
| Erneg      | IVW (initial)               | -0.106          | 0.055 | 0.058    | 0.899 | 0.808   | 1.001   | <2e-04                                 | 6.99E-07   |
|            | IVW (after outlier removal) | -0.091          | 0.044 | 0.046    | 0.913 | 0.837   | 0.996   | 0.051                                  | 1.36E-02   |

IVW (initial)

Inverse variance-weighted analysis

IVW (after outlier removal)

Inverse variance-weighted analysis after removal of outlying variants identified by the MR-PRESSO heterogeneity test

Q' p-value

Q' heterogeneity test using modified second order weighting for two-sample Mendelian randomization studies. Bowden et al. Improving the accuracy of two-sample summary data Mendelian randomization: moving beyond the NOME assumption. Preprint manuscript posted on biorxiv February 27, 2018. doi: <https://doi.org/10.1101/159442>

MR-PRESSO global heterogeneity p-value

MR-PRESSO global heterogeneity test. Verbanck et al. Nat Genet 2018;50(5):693-698. PMID: 29686387.

### **Supplementary Table 7**

Mendelian randomization results of changes in blood lipids due to genetic variants in genes encoding drug targets.

The analysis takes into account the correlation between variants ( $R^2 < 0.4$ ). References: Yavorska & Burgess Int J Epidemiol 2017;46(6):1734-1739. PMID: 28398548. Burgess et al. Stat Med 2016;35(11):1880-1906. PMID: 2661904.

| Genetic correlations considered in MR |                 | b      | se    | 95% lci | 95% uci | p     | OR    | 95% LCI | 95% UCI | Q' p-value |
|---------------------------------------|-----------------|--------|-------|---------|---------|-------|-------|---------|---------|------------|
| <b>PCSK9</b>                          |                 |        |       |         |         |       |       |         |         |            |
| BCA                                   | IVW             | 0.095  | 0.039 | 0.019   | 0.172   | 0.014 | 1.100 | 1.019   | 1.187   | 0.867      |
|                                       | Egger           | 0.090  | 0.083 | -0.073  | 0.253   | 0.281 | 1.094 | 0.929   | 1.288   |            |
|                                       | Egger intercept | 0.000  | 0.005 | -0.010  | 0.011   | 0.928 | 1.000 | 0.990   | 1.011   |            |
| Erpos                                 | IVW             | 0.076  | 0.046 | -0.014  | 0.166   | 0.099 | 1.079 | 0.986   | 1.181   | 0.893      |
|                                       | Egger           | 0.055  | 0.086 | -0.113  | 0.223   | 0.523 | 1.056 | 0.893   | 1.249   |            |
|                                       | Egger intercept | 0.002  | 0.006 | -0.009  | 0.013   | 0.739 | 1.002 | 0.991   | 1.013   |            |
| Erneg                                 | IVW             | 0.123  | 0.072 | -0.019  | 0.264   | 0.089 | 1.130 | 0.982   | 1.302   | 0.619      |
|                                       | Egger           | 0.102  | 0.114 | -0.120  | 0.325   | 0.368 | 1.108 | 0.887   | 1.384   |            |
|                                       | Egger intercept | 0.002  | 0.007 | -0.012  | 0.016   | 0.815 | 1.002 | 0.988   | 1.016   |            |
| <b>CETP</b>                           |                 |        |       |         |         |       |       |         |         |            |
| BCA                                   | IVW             | 0.065  | 0.020 | 0.026   | 0.105   | 0.001 | 1.068 | 1.026   | 1.110   | 0.530      |
|                                       | Egger           | -0.003 | 0.072 | -0.143  | 0.138   | 0.972 | 0.997 | 0.866   | 1.148   |            |
|                                       | Egger intercept | 0.011  | 0.010 | -0.010  | 0.031   | 0.311 | 1.011 | 0.990   | 1.032   |            |
| Erpos                                 | IVW             | 0.078  | 0.024 | 0.031   | 0.124   | 0.001 | 1.081 | 1.032   | 1.133   | 0.390      |
|                                       | Egger           | 0.005  | 0.077 | -0.147  | 0.157   | 0.948 | 1.005 | 0.864   | 1.170   |            |
|                                       | Egger intercept | 0.011  | 0.011 | -0.011  | 0.033   | 0.315 | 1.011 | 0.989   | 1.034   |            |
| Erneg                                 | IVW             | 0.065  | 0.037 | -0.007  | 0.137   | 0.075 | 1.067 | 0.993   | 1.147   | 0.938      |
|                                       | Egger           | 0.034  | 0.103 | -0.167  | 0.235   | 0.741 | 1.035 | 0.846   | 1.266   |            |
|                                       | Egger intercept | 0.005  | 0.015 | -0.024  | 0.034   | 0.746 | 1.005 | 0.976   | 1.035   |            |
| <b>NPC1L1</b>                         |                 |        |       |         |         |       |       |         |         |            |
| BCA                                   | IVW             | 0.334  | 0.131 | 0.076   | 0.591   | 0.011 | 1.396 | 1.079   | 1.806   | 0.667      |
|                                       | Egger           | -0.329 | 1.655 | -3.573  | 2.914   | 0.842 | 0.719 | 0.028   | 18.433  |            |
|                                       | Egger intercept | 0.022  | 0.056 | -0.087  | 0.131   | 0.687 | 1.023 | 0.917   | 1.140   |            |
| Erpos                                 | IVW             | 0.449  | 0.157 | 0.141   | 0.757   | 0.004 | 1.567 | 1.151   | 2.133   | 0.625      |
|                                       | Egger           | -0.423 | 1.860 | -4.068  | 3.222   | 0.820 | 0.655 | 0.017   | 25.089  |            |
|                                       | Egger intercept | 0.030  | 0.063 | -0.093  | 0.152   | 0.637 | 1.030 | 0.911   | 1.164   |            |
| Erneg                                 | IVW             | 0.057  | 0.239 | -0.411  | 0.525   | 0.811 | 1.059 | 0.663   | 1.691   | 0.797      |
|                                       | Egger           | -1.088 | 1.660 | -4.341  | 2.164   | 0.512 | 0.337 | 0.013   | 8.709   |            |
|                                       | Egger intercept | 0.038  | 0.058 | -0.076  | 0.152   | 0.509 | 1.039 | 0.927   | 1.165   |            |
| <b>LDLR</b>                           |                 |        |       |         |         |       |       |         |         |            |
| BCA                                   | IVW             | 0.012  | 0.036 | -0.057  | 0.082   | 0.726 | 1.013 | 0.944   | 1.086   | 0.413      |
|                                       | Egger           | -0.034 | 0.053 | -0.139  | 0.070   | 0.522 | 0.966 | 0.871   | 1.073   |            |
|                                       | Egger intercept | 0.005  | 0.004 | -0.003  | 0.013   | 0.231 | 1.005 | 0.997   | 1.013   |            |
| Erpos                                 | IVW             | 0.023  | 0.049 | -0.074  | 0.119   | 0.642 | 1.023 | 0.929   | 1.127   | 0.249      |
|                                       | Egger           | -0.045 | 0.063 | -0.169  | 0.079   | 0.475 | 0.956 | 0.844   | 1.082   |            |
|                                       | Egger intercept | 0.007  | 0.005 | -0.002  | 0.017   | 0.141 | 1.007 | 0.998   | 1.017   |            |
| Erneg                                 | IVW             | -0.070 | 0.063 | -0.193  | 0.052   | 0.260 | 0.932 | 0.824   | 1.053   | 0.897      |
|                                       | Egger           | -0.178 | 0.145 | -0.462  | 0.106   | 0.220 | 0.837 | 0.630   | 1.112   |            |
|                                       | Egger intercept | 0.012  | 0.012 | -0.011  | 0.035   | 0.309 | 1.012 | 0.989   | 1.035   |            |
| <b>HMGCR</b>                          |                 |        |       |         |         |       |       |         |         |            |
| BCA                                   | IVW             | 0.146  | 0.085 | -0.021  | 0.313   | 0.086 | 1.157 | 0.980   | 1.367   | 0.827      |
|                                       | Egger           | 0.224  | 0.398 | -0.557  | 1.005   | 0.574 | 1.251 | 0.573   | 2.731   |            |
|                                       | Egger intercept | -0.006 | 0.027 | -0.059  | 0.048   | 0.835 | 0.994 | 0.942   | 1.049   |            |
| Erpos                                 | IVW             | 0.159  | 0.101 | -0.039  | 0.357   | 0.116 | 1.172 | 0.961   | 1.429   | 0.168      |
|                                       | Egger           | 0.088  | 0.391 | -0.677  | 0.854   | 0.822 | 1.092 | 0.508   | 2.348   |            |
|                                       | Egger intercept | 0.005  | 0.027 | -0.047  | 0.058   | 0.847 | 1.005 | 0.954   | 1.059   |            |
| Erneg                                 | IVW             | 0.130  | 0.155 | -0.174  | 0.434   | 0.402 | 1.139 | 0.840   | 1.543   | 0.798      |
|                                       | Egger           | 0.489  | 0.859 | -1.196  | 2.173   | 0.570 | 1.630 | 0.302   | 8.788   |            |
|                                       | Egger intercept | -0.026 | 0.059 | -0.142  | 0.089   | 0.656 | 0.974 | 0.868   | 1.093   |            |
